# Supplementary material for: Sensitive, High-Throughput HLA-I and HLA-II Immunopeptidomics Using Parallel Accumulation-Serial Fragmentation Mass Spectrometry
Source: PubMed Central journal article supplement (PMC10326702; doi:10.1016/j.mcpro.2023.100563), 2023-05-03

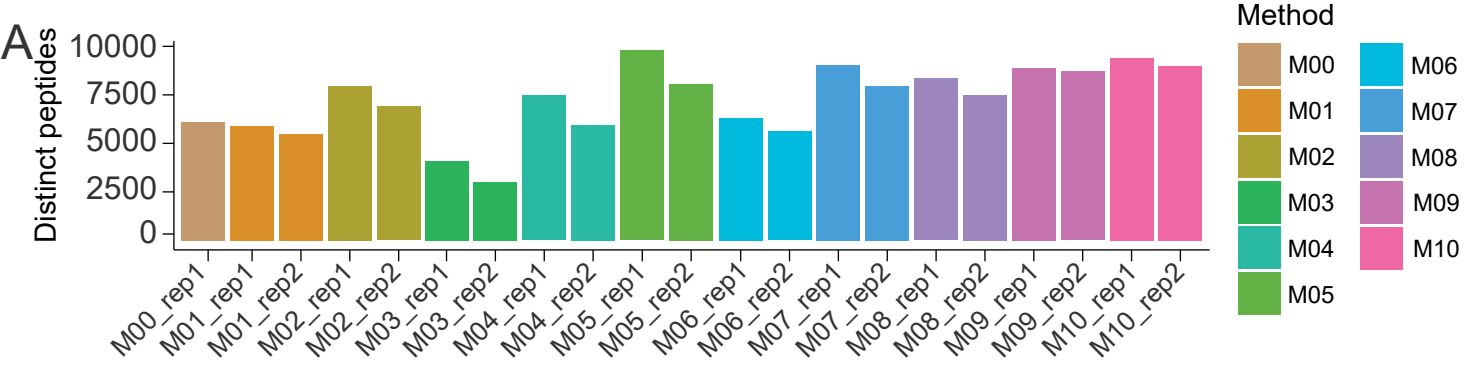

### B

| directory  | CE      | HLA-I peptides | Score median | % SPI median | % BCS median | PDI median [+1] | PDI median [+2] | PDI median [+3] | Score median [+1] | Score median [+2] | Score median [+3] |
|------------|---------|----------------|--------------|--------------|--------------|-----------------|-----------------|-----------------|-------------------|-------------------|-------------------|
| M00 - rep1 | 20-59   | 6447           | 8.2          | 68.7         | 6.0          | 67.3            | 93.2            | 95.7            | 12.1              | 8.2               | 7.0               |
| M01 - rep1 | 20-59   | 6188           | 8.6          | 70.3         | 6.0          | 69.9            | 93.4            | 95.6            | 9.4               | 8.7               | 7.3               |
| M01 - rep2 | 20-59   | 5726           | 8.5          | 70.0         | 6.0          | 76.2            | 93.9            | 95.9            | 8.3               | 8.7               | 7.2               |
| M02 - rep1 | 20-59   | 8361           | 8.7          | 70.8         | 6.0          | 95.3            | 93.2            | 95.6            | 8.8               | 8.7               | 7.3               |
| M02 - rep2 | 20-59   | 7199           | 8.6          | 70.8         | 6.0          | 96.4            | 93.8            | 95.7            | 8.7               | 8.7               | 7.1               |
| M03 - rep1 | 30-65   | 4438           | 7.3          | 68.3         | 6.0          | 98.1            | 97.0            | 97.7            | 8.1               | 6.9               | 5.8               |
| M03 - rep2 | 30-65   | 3343           | 7.1          | 67.9         | 6.0          | 98.5            | 97.1            | 97.7            | 7.6               | 6.8               | 5.5               |
| M04 - rep1 | Stepped | 7791           | 8.4          | 70.0         | 6.0          | 98.0            | 93.2            | 95.7            | 8.0               | 8.6               | 7.2               |
| M04 - rep2 | Stepped | 6244           | 8.3          | 70.1         | 6.0          | 98.4            | 93.9            | 95.7            | 8.1               | 8.5               | 7.1               |
| M05 - rep1 | 10-55   | 10130          | 9.7          | 72.7         | 6.0          | 91.1            | 69.7            | 65.1            | 9.2               | 10.3              | 8.0               |
| M05 - rep2 | 10-55   | 8409           | 9.9          | 73.4         | 6.0          | 92.6            | 70.3            | 66.0            | 9.3               | 10.3              | 8.0               |
| M06 - rep1 | 20-59   | 6538           | 8.2          | 69.0         | 6.0          | 96.0            | 92.9            | 95.4            | 8.5               | 8.1               | 6.8               |
| M06 - rep2 | 20-59   | 6024           | 8.2          | 69.1         | 6.0          | 95.9            | 93.5            | 95.5            | 8.5               | 8.1               | 6.7               |
| M07 - rep1 | 20-59   | 9468           | 8.8          | 71.2         | 6.0          | 95.5            | 92.9            | 95.2            | 8.9               | 8.7               | 7.5               |
| M07 - rep2 | 20-59   | 8292           | 8.8          | 71.2         | 6.0          | 95.7            | 93.4            | 95.7            | 9.1               | 8.7               | 7.3               |
| M08 - rep1 | 20-59   | 8519           | 9.9          | 75.7         | 6.0          | 96.0            | 93.8            | 95.6            | 9.8               | 10.0              | 8.1               |
| M08 - rep2 | 20-59   | 7576           | 9.9          | 76.0         | 6.0          | 96.1            | 94.1            | 95.9            | 9.7               | 10.0              | 8.2               |
| M09 - rep1 | 10-55   | 9162           | 10.1         | 73.9         | 6.0          | 91.9            | 71.0            | 68.0            | 9.4               | 10.5              | 8.0               |
| M09 - rep2 | 10-55   | 9063           | 10.0         | 73.9         | 6.0          | 91.5            | 70.0            | 65.1            | 9.4               | 10.5              | 8.0               |
| M10 - rep1 | 10-55   | 9493           | 11.3         | 78.4         | 6.0          | 92.1            | 70.7            | 64.2            | 10.5              | 12.0              | 8.8               |
| M10 - rep2 | 10-55   | 9001           | 11.4         | 78.5         | 6.0          | 91.5            | 69.2            | 62.6            | 10.3              | 12.1              | 9.0               |

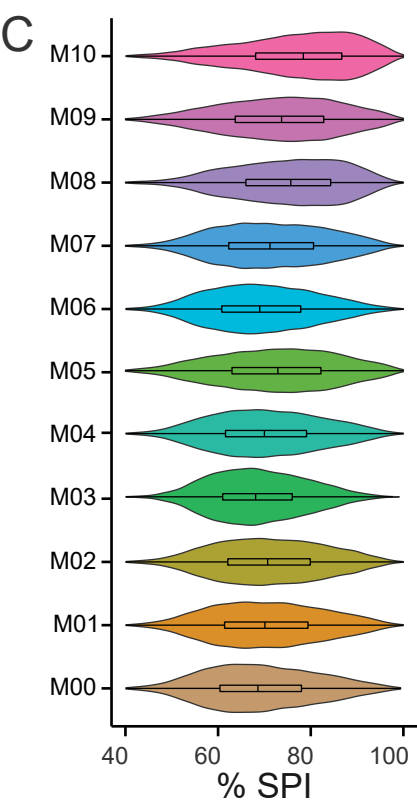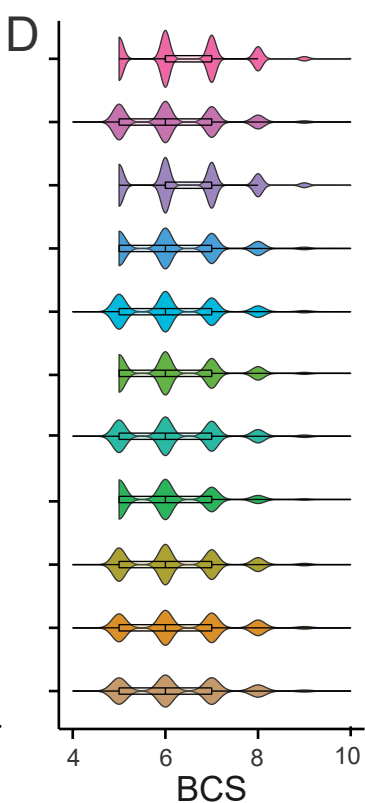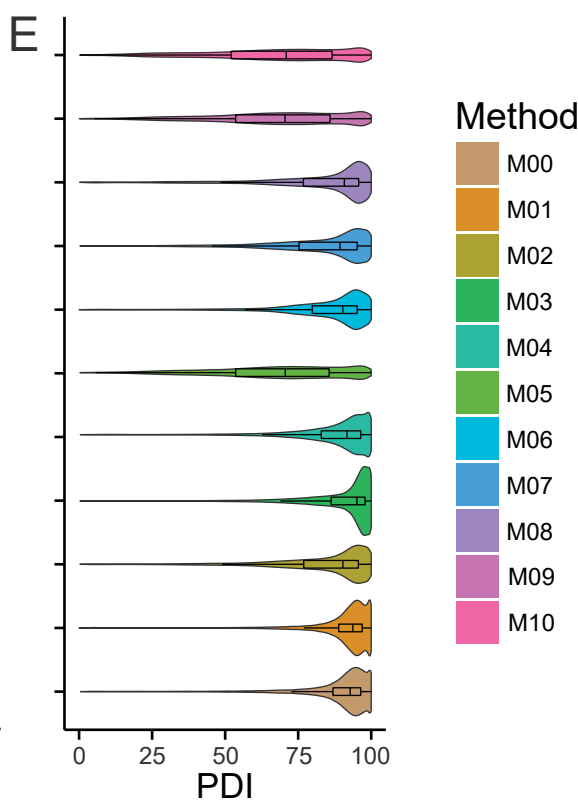

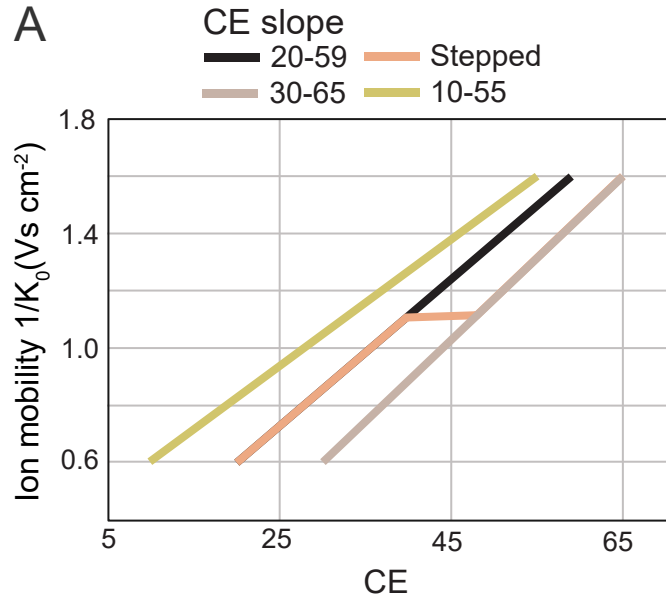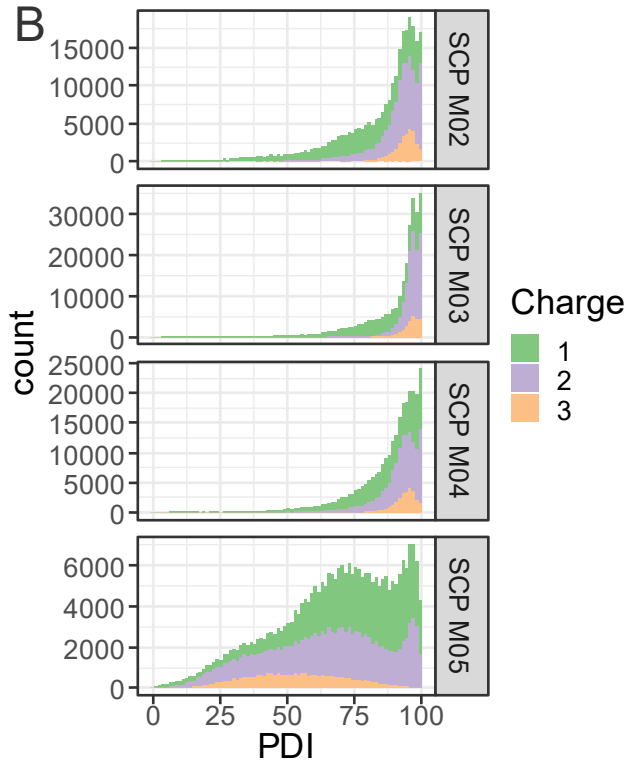

A

HLA-I

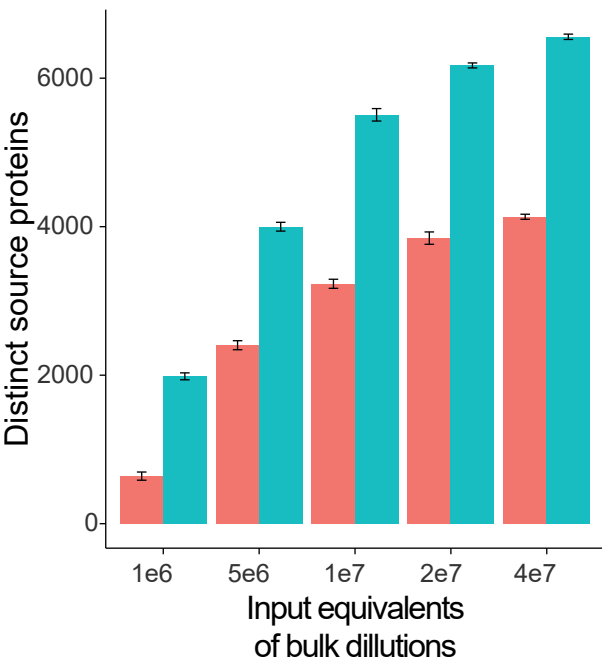

B

HLA-II

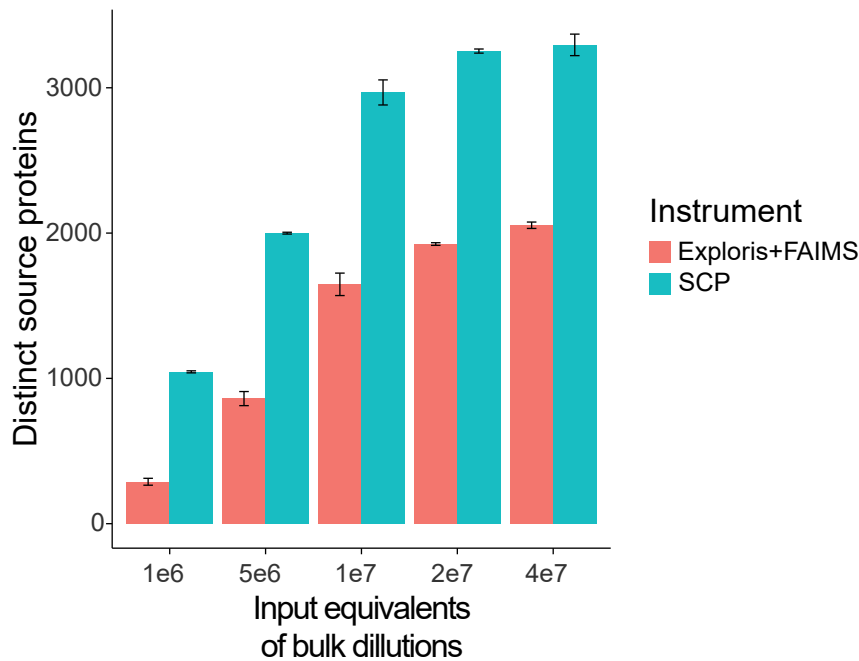

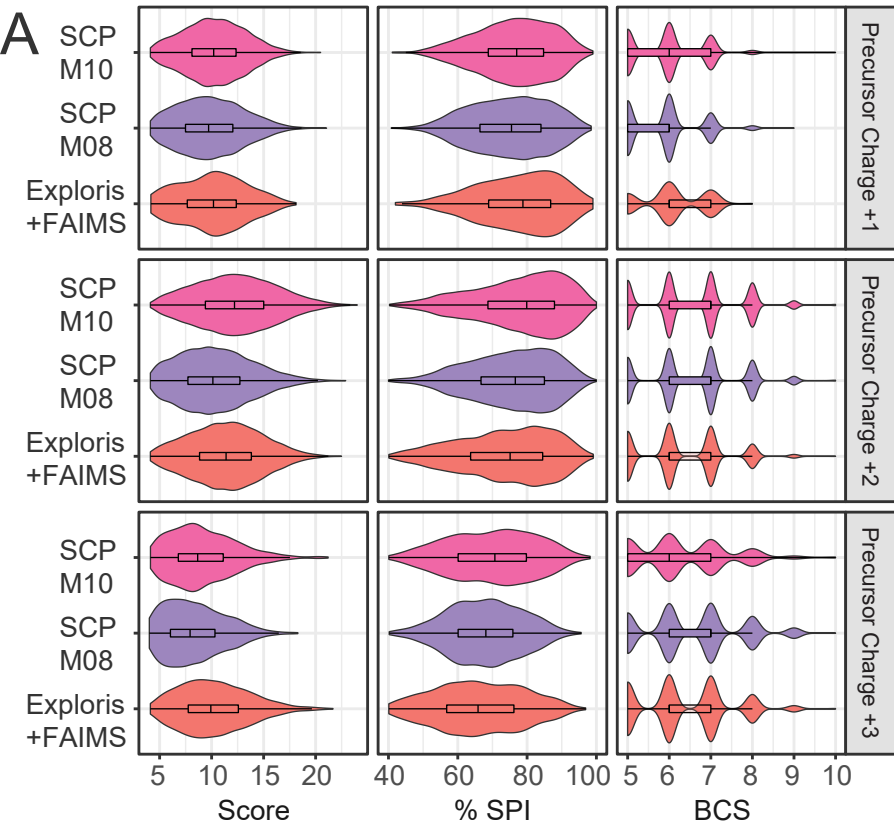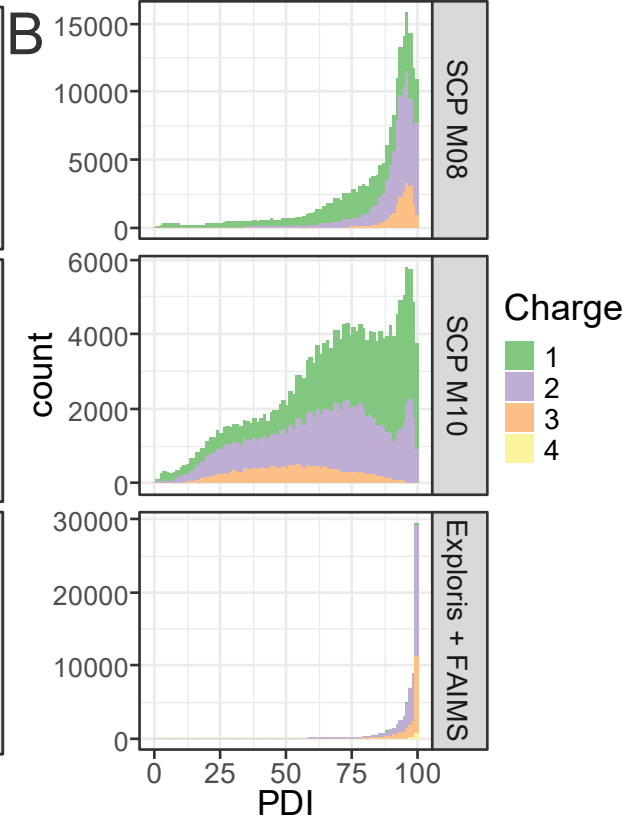

**C**

| Sample         | Score median | % SPI median | % BCS median | PDI median [+1] | PDI median [+2] | PDI median [+3] | PDI median [+4] |
|----------------|--------------|--------------|--------------|-----------------|-----------------|-----------------|-----------------|
| SCP M10        | 11.3         | 78.4         | 6.0          | 92.1            | 70.7            | 64.2            | N/A             |
| SCP M08        | 9.9          | 75.7         | 6.0          | 96.0            | 93.8            | 95.6            | N/A             |
| Exploris+FAIMS | 10.63        | 75.9         | 6.0          | N/A             | 98              | 98.1            | 97.6            |

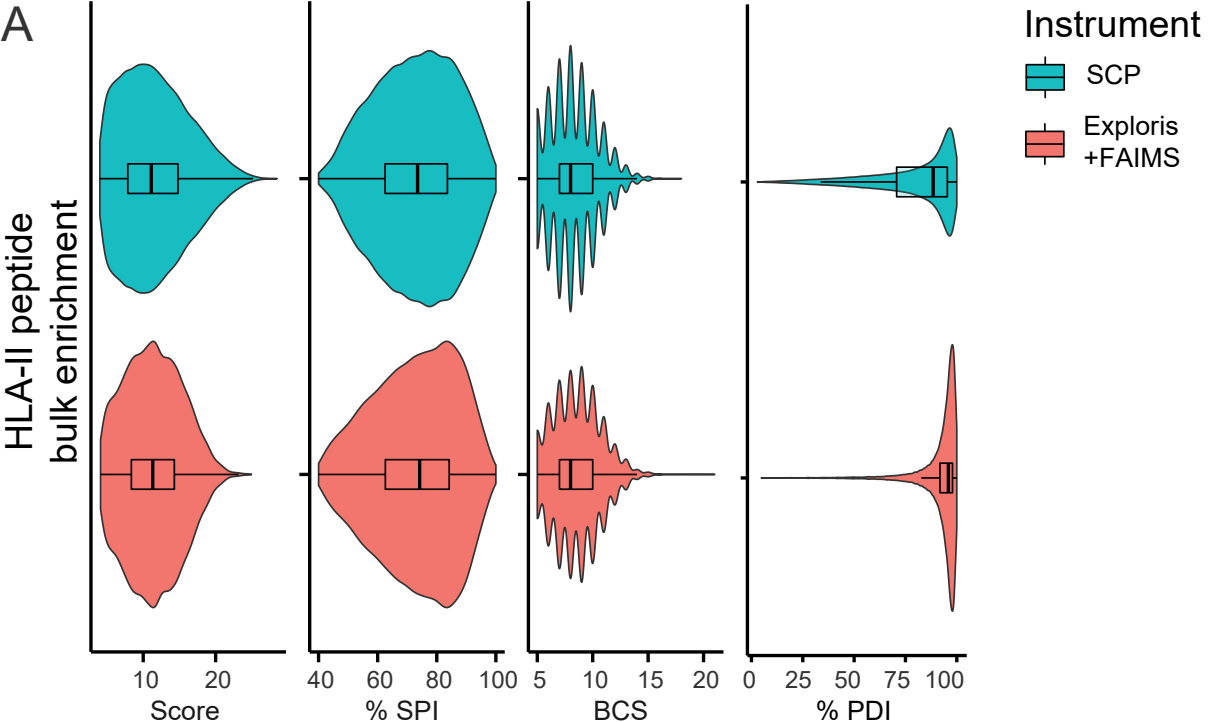

**B**

| Sample         | Score median | % SPI median | % BCS median | PDI median [+2] | PDI median [+3] | PDI median [+4] | PDI median [+5] |
|----------------|--------------|--------------|--------------|-----------------|-----------------|-----------------|-----------------|
| SCP            | 10.61        | 71.1         | 8            | 75.2            | 91.8            | 95.7            | 96.75           |
| Exploris+FAIMS | 10.85        | 74.9         | 8.5          | 98.8            | 98.9            | 98.9            | 98.6            |

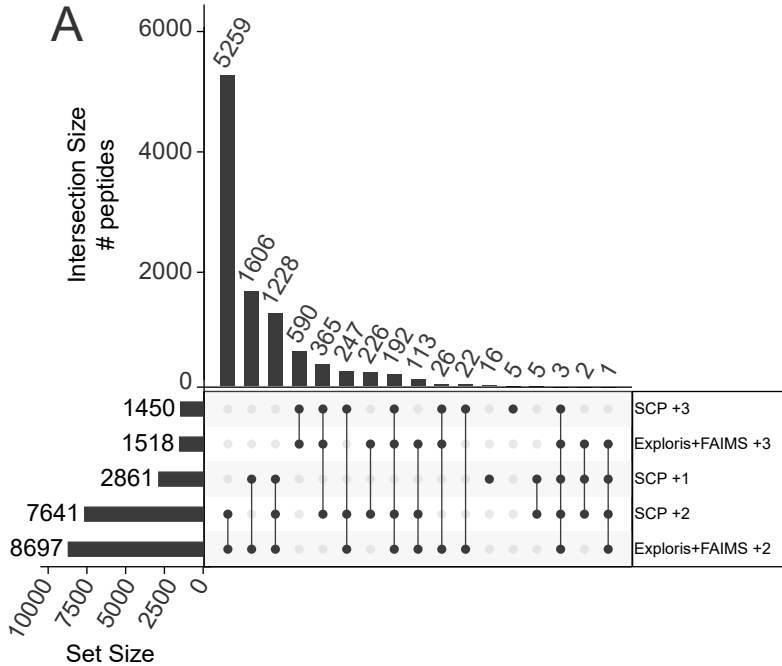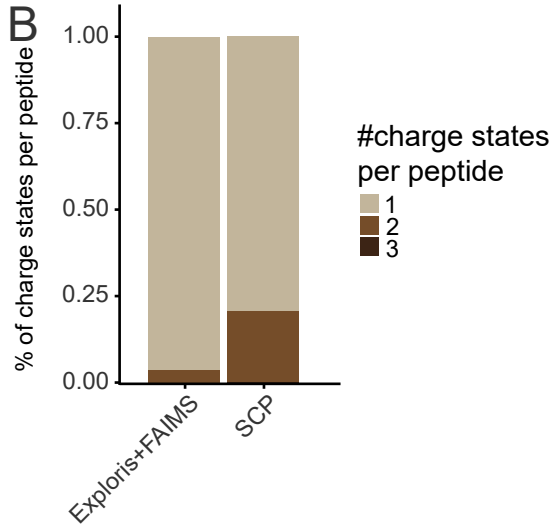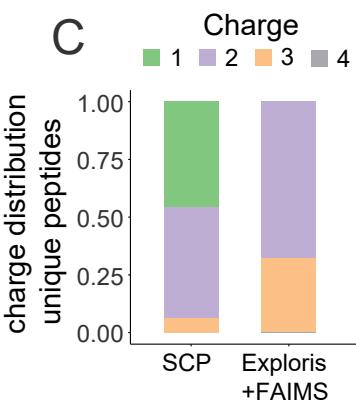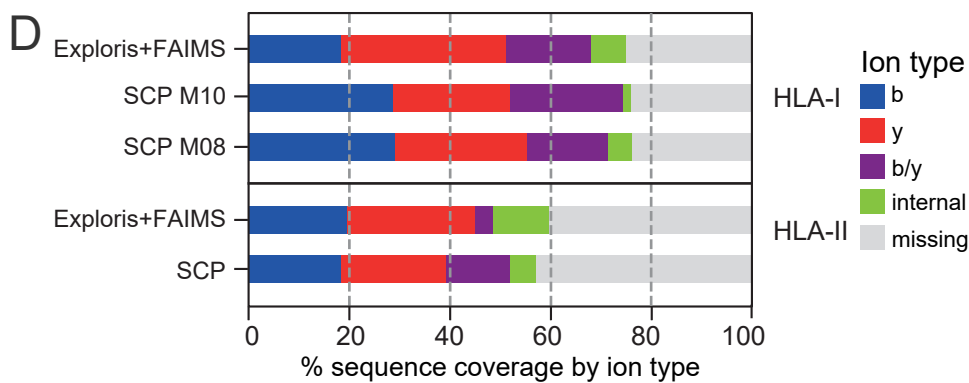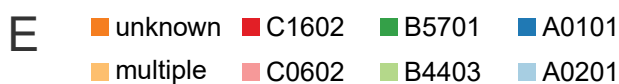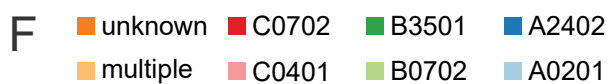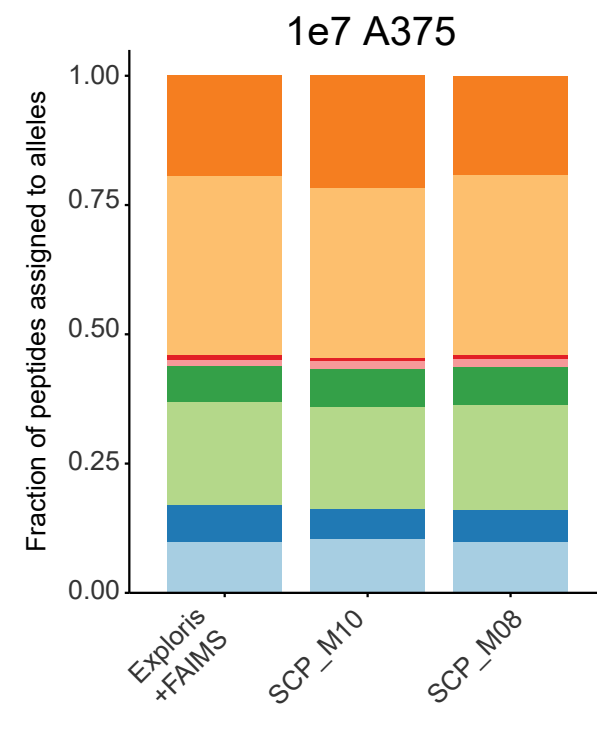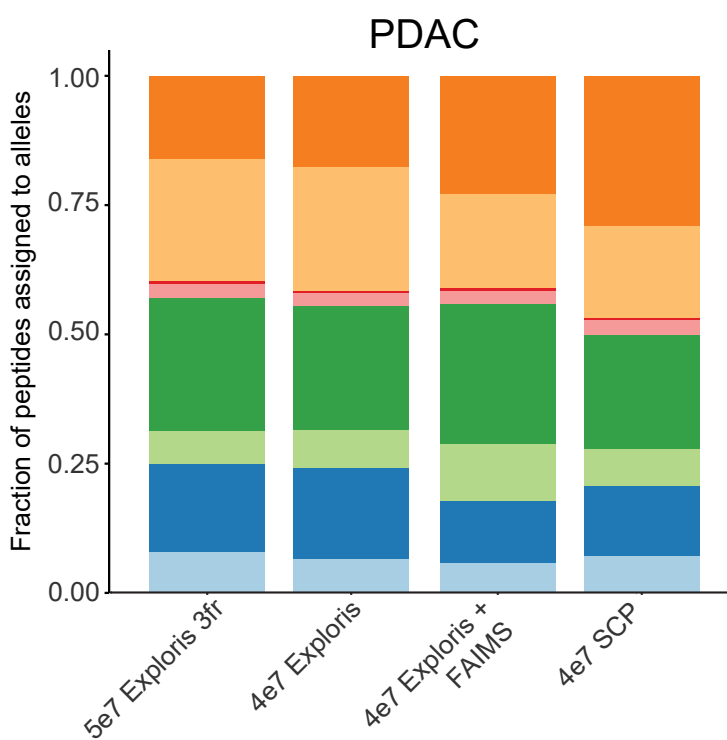

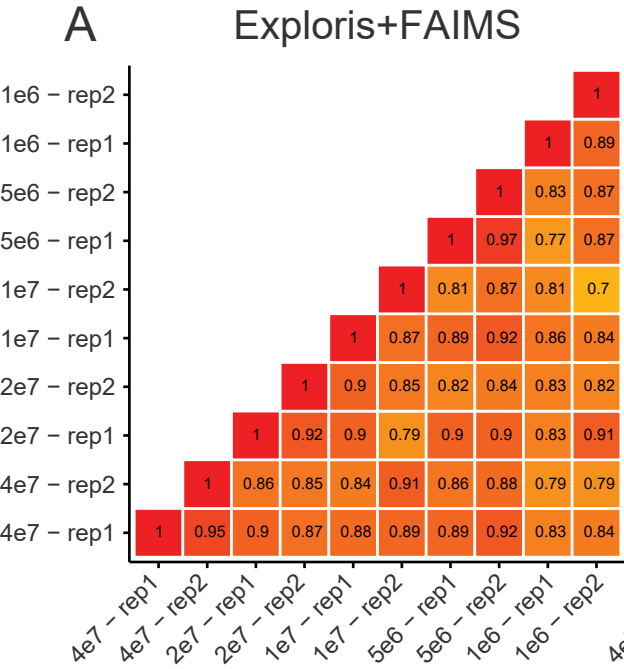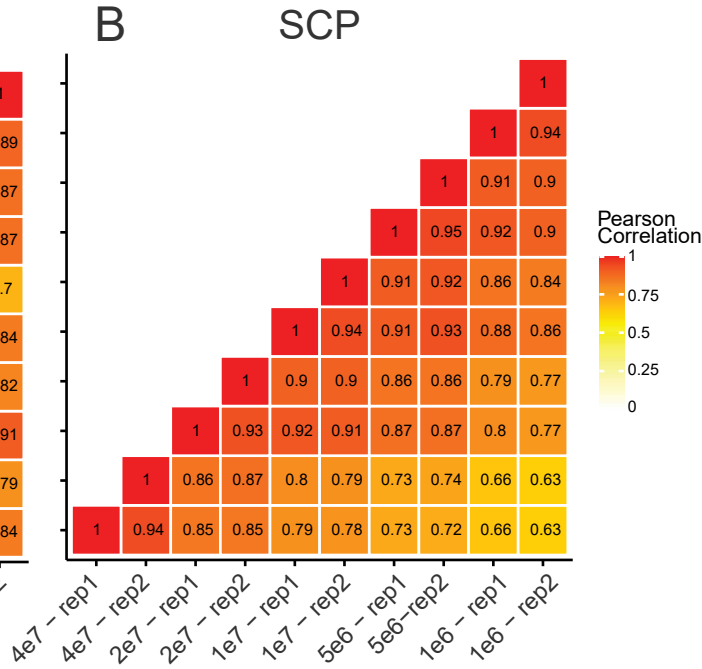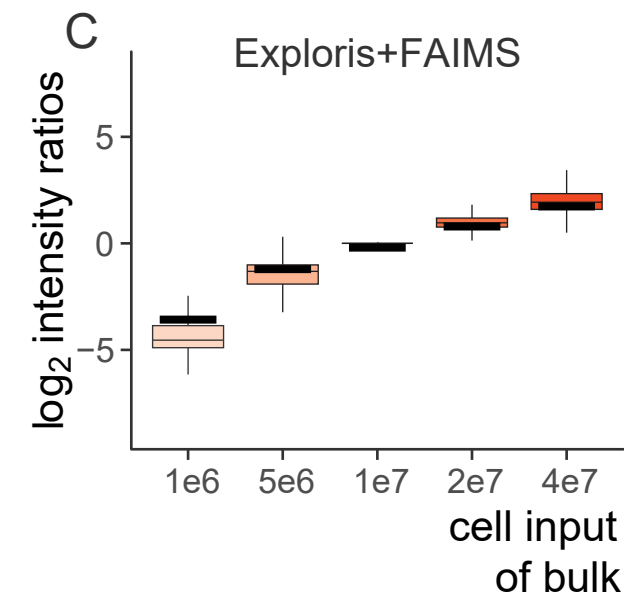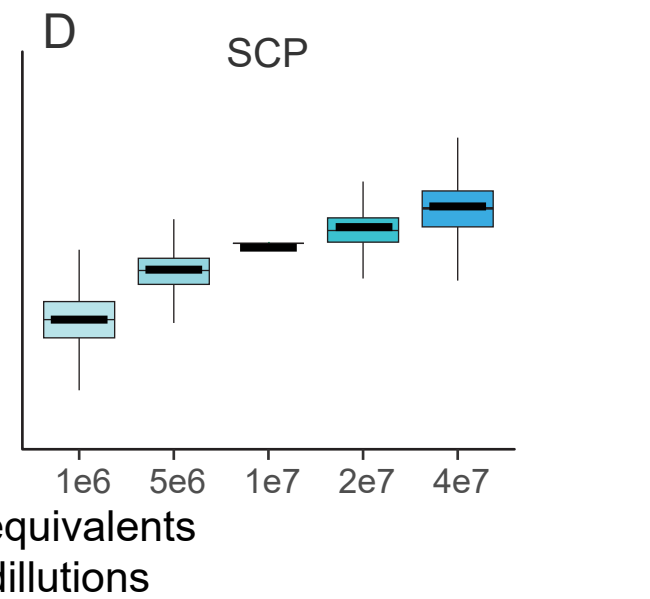

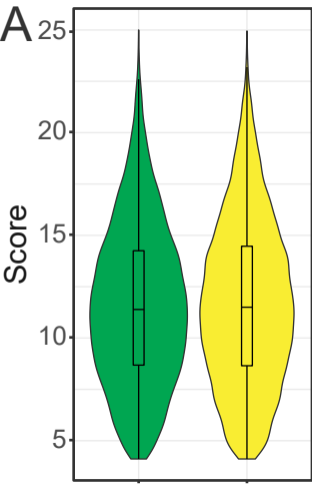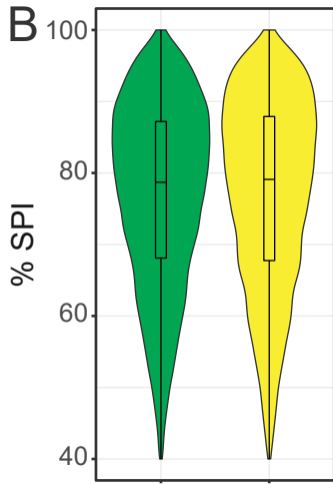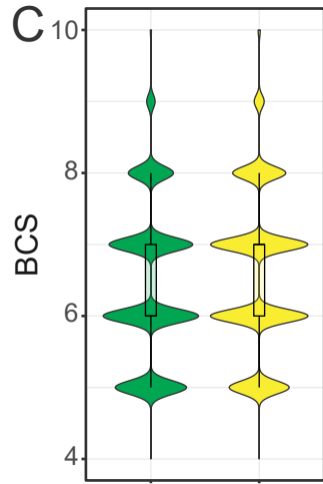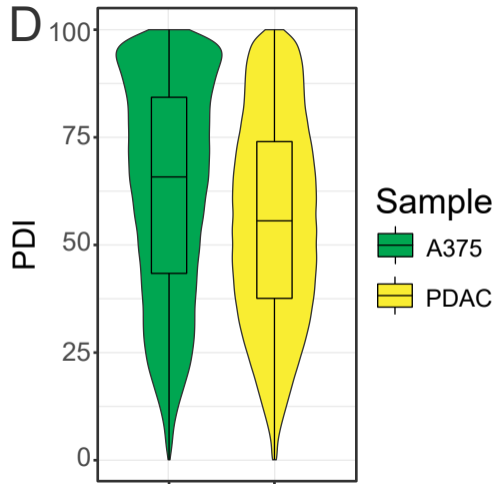



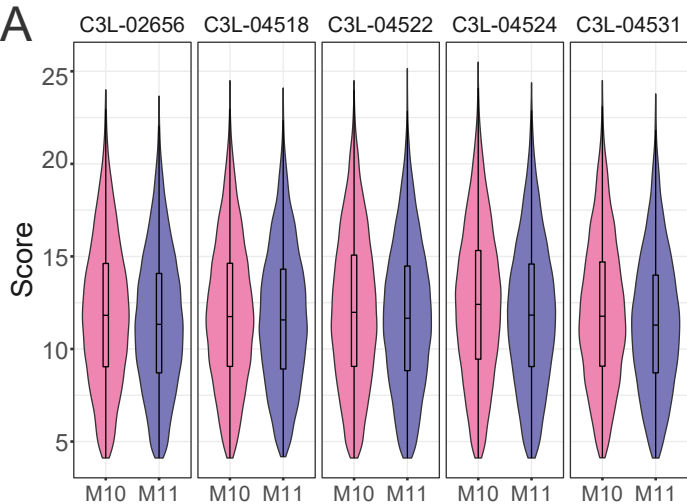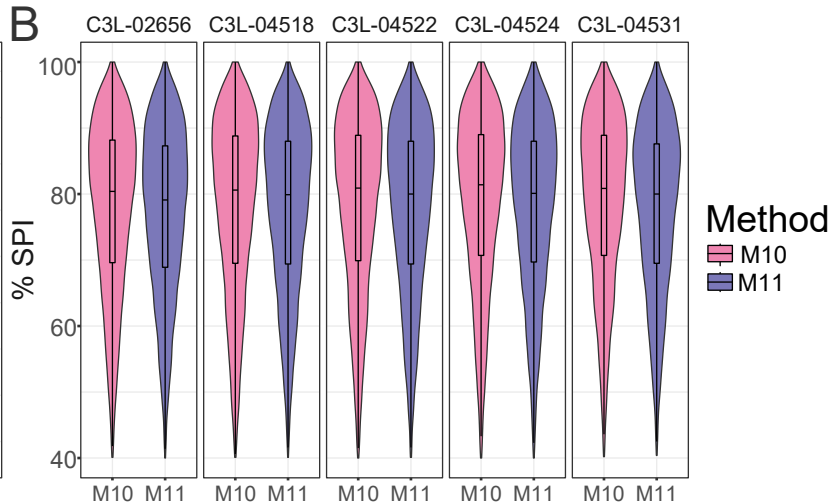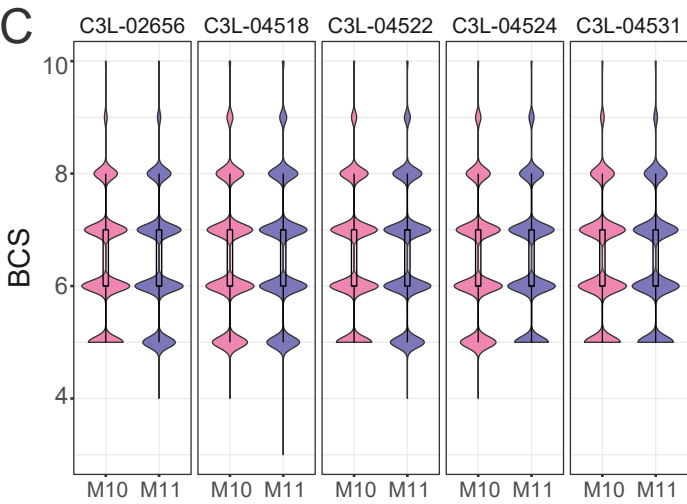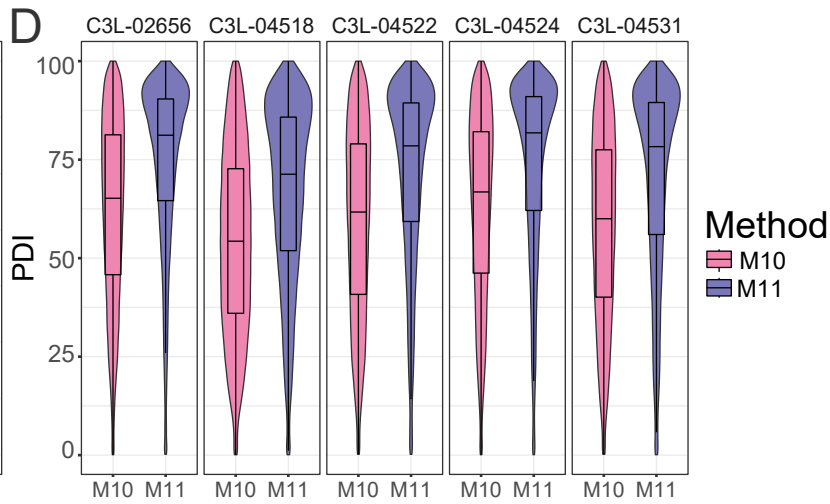

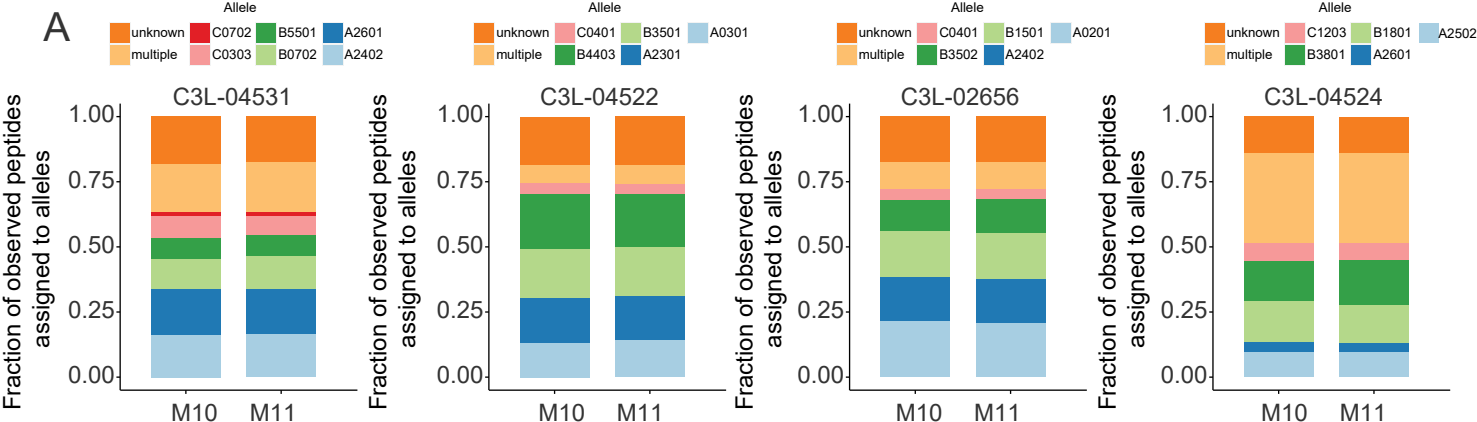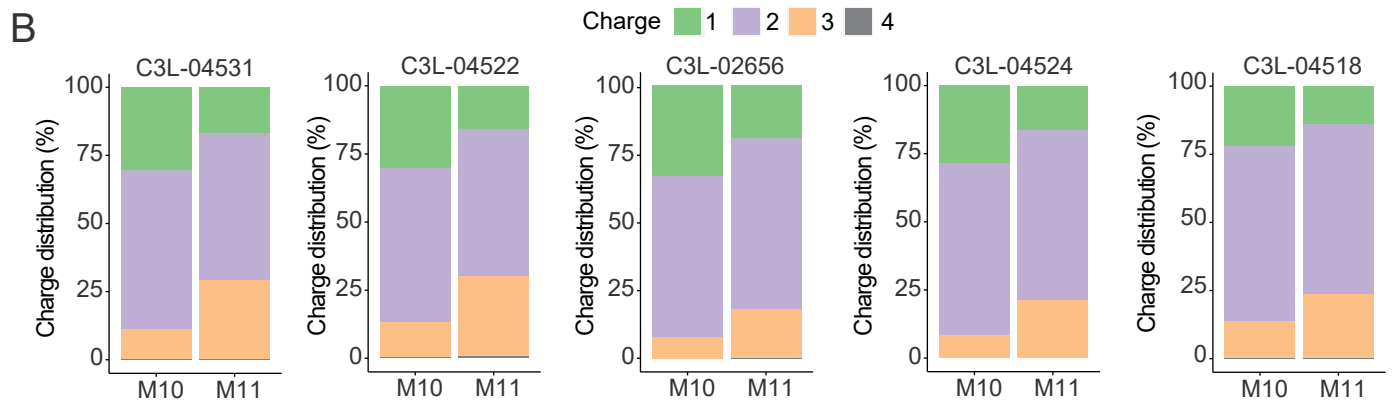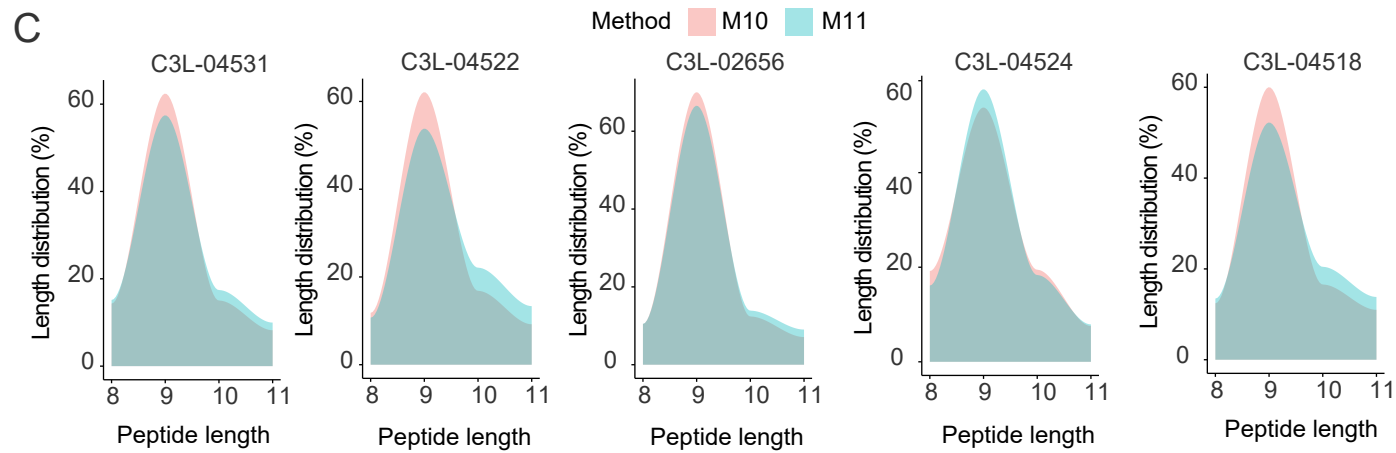

Supplement: mmc1.pdf [file mmc1.pdf]
